# Supplementary material for: Unsupervised classification of the Northwestern European seas based on satellite altimetry data
Source: Copernicus journal article supplement (doi:10.5194/egusphere-2023-1468), 2023-07-12
Supplement: Supplementary file [file egusphere-2023-1468-AC1-supplement.pdf]

# Response to Reviewer#1

Review of “Unsupervised classification of the Northwestern European seas based on satellite altimetry data” by Poropat et al., 2023

In this work, Poropat and colleagues use a Gaussian Mixture Model (GMM) to identify coherent regions of sea-level variability in the Northwestern European Seas. They show how the number of EOFs and the number of classes (mixtures) in the models are important parameters that can result in different patterns, but the main classification remains the same, showing the robustness of their method. The work is focused on the method itself, and I personally missed a bit more discussion into what the identified patterns could actually mean. Nonetheless, I believe this is an important work and a good addition to the scientific community, which could be the base for more process-based studies in the future.

We thank the reviewer for their positive evaluation and valuable questions and comments that helped us to improve our manuscript. Note that the contribution of the reviewers has been duly acknowledged in the manuscript (see acknowledgement section). We added more discussion about the physical processes that might be related to the identified patterns. We address all the comments in the following text.

Before addressing the comments, we would like to mention that we changed the data set used in the whole manuscript in response to a question by Reviewer#2 about the time span of data we used to train our models. To address their comment, we downloaded the extended data set from years 1995-2021 and re-did all the experiments. However, in the time between we obtained the data used for the results presented in the first submission of the manuscript and now, the data set has also been re-processed (see description of the changes to the processing chain at <https://catalogue.marine.copernicus.eu/documents/QUID/CMEMS-SL-QUID-008-032-068.pdf>).

Both the different processing of the altimetry observations and to some extent the change in the time span used for model training affect the results of the classification. You can see the new results (replacement for Figs. 3 and 4 in the manuscript) in Figs. R1 and R2. In the cases where the reviewer’s comment or our answer is affected by the change in the data set, we point that out in the reply to the specific comment.

## Summary of the changes in the classification results

With the new data set, when considering the whole Northwestern European continental shelf (Fig. 3 manuscript and Fig. R1 here) the simplest model remains the same, the intermediate model has one fewer class (class O1 from the original manuscript is not visible in this model), and the complex model remains virtually the same. Class O1 is also found by this model, suggesting that the signals responsible for it are still present in the data, but now only in the higher EOFs, which is why a model using only five of them does not capture it. The area with low likelihood in the southern North Sea visible on Figure 3c in the original manuscript is also gone, suggesting that it was a result of data processing in the old data set. Additionally, with this data set, we obtain almost identical K=10 classification with 8, 9, 10, and 11 EOFs, of which we decided to display the results with 9 EOFs because it is the lowest number of EOFs (meaning the fastest model) for which the model reaches the minimal likelihood of 0.95 averaged over the whole region.

Of the sub-regions (Fig. 4 manuscript and Fig. R2) the Baltic Sea region classification remains the same and the classification of the North Sea has a difference only along the southern coast, most likely for the same reason as the difference in likelihood in the whole area model, but we now need 5 EOFs to achieve that instead of only 3. This unfortunately means that it is no longer possible to directly show this model in the abstract EOF space because it now requires 5 dimensions. Fig. 6 in

the manuscript, therefore, now has only the simple model of the whole region and the discussion of the classes in the abstract space is shortened.

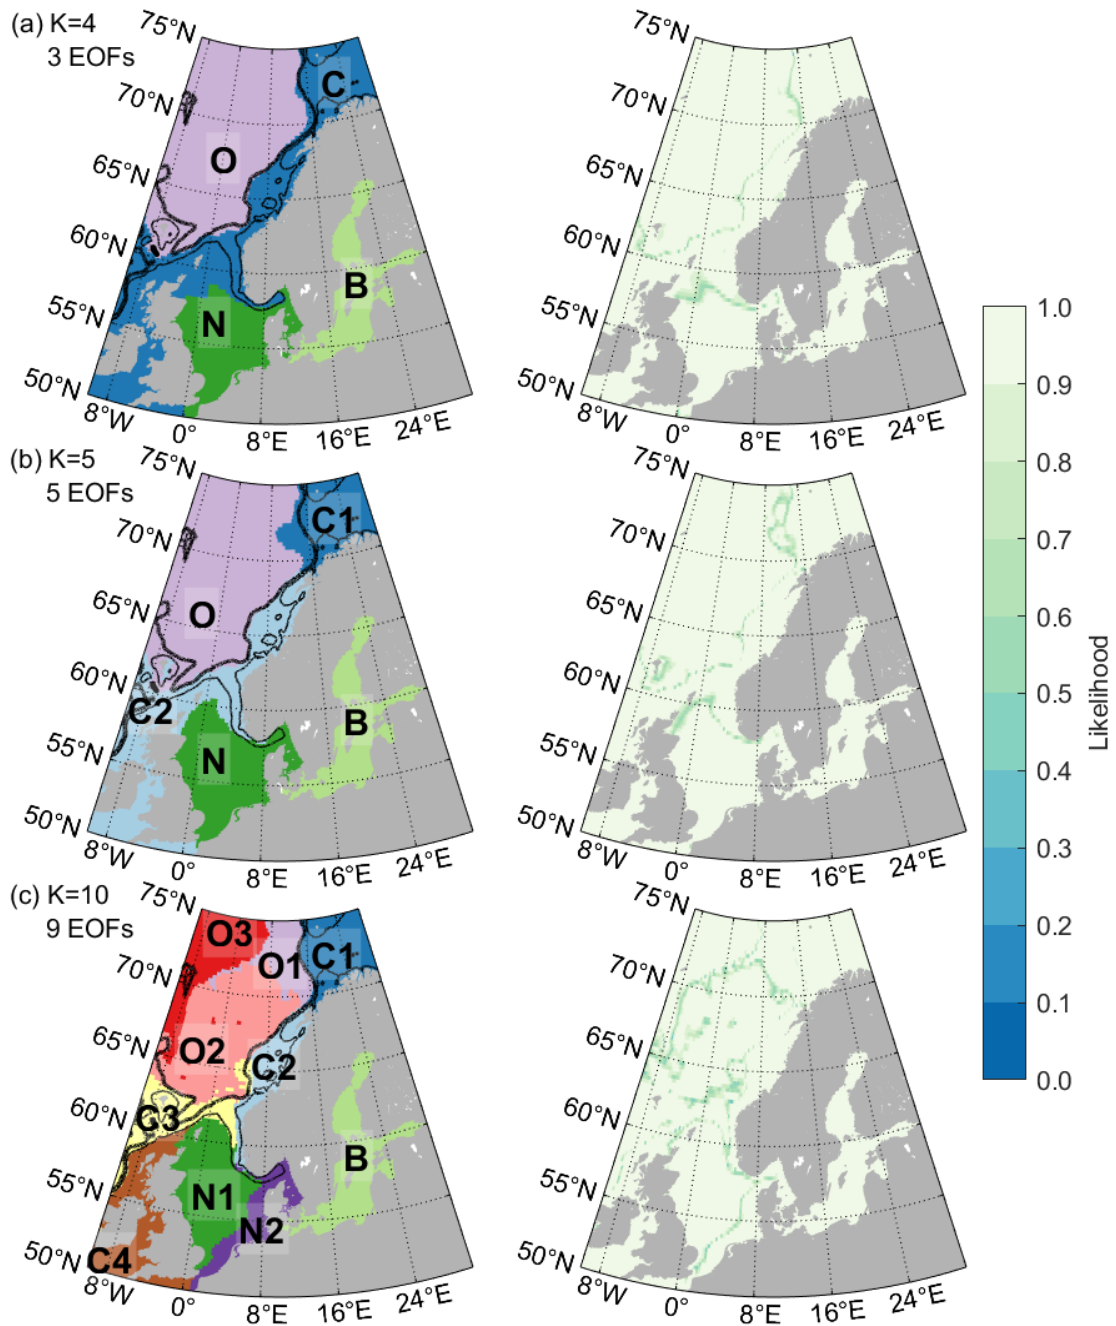

**Figure R1:** Replacement for manuscript Fig. 3. Classification using an ensemble of 200 Gaussian Mixture Models (left) and the respective likelihoods of the model sorting the grid points to that particular class (right). Classification is performed using 3 (a), 5 (b), and 9 (c) empirical orthogonal functions and 4, 5, and 10 classes, respectively. Letters indicate the names used to refer to the regions in the core of the text. Contour lines represent the 250 and 1000 m isobaths.

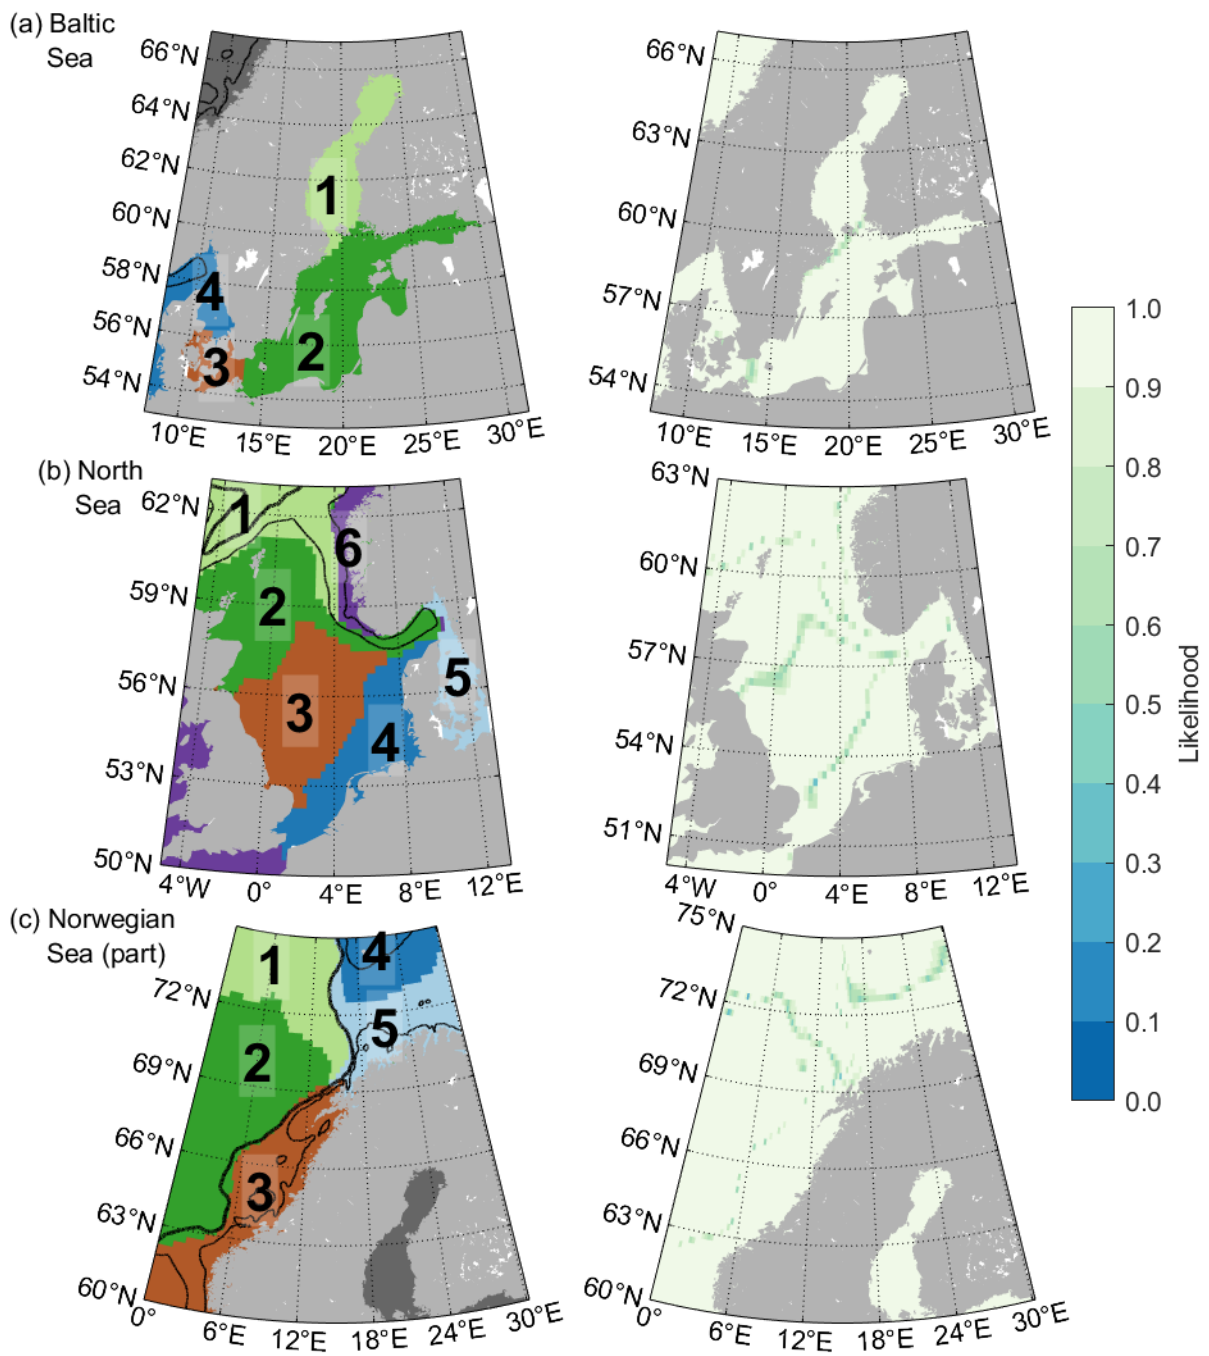

**Figure R2:** Replacement for manuscript Fig. 4. Classification using an ensemble of 200 Gaussian Mixture Models (left) and the respective likelihoods of the model sorting the grid points to that particular class (right) for the Baltic Sea performed using 4 EOFs (a); North Sea using 5 EOFs (b); and part of the Norwegian Sea using 6 EOFs (c). Numbers indicate the assigned classes. Contour lines represent the 250 and 1000 m isobaths.

For the Norwegian Sea we did not manage to obtain the same number of classes as before, the highest K with stable results is 6. The likelihood is also lower than previously.

## Major comments

Number of EOFs X Number of Classes: The results from Section 3.1 are very interesting. But for me it wasn't clear if the different classifications are from adding more EOFs or from changing the number of classes. The authors used a "non subjective" way to choose the number of classes, which is important for several reasons.

But I do wonder, if the results from Figure 3 would be the similar if they fixed the number of EOFs, and just changed the number of classes. Was this tested? Because during the entire Section 3.1, the authors presents the results as an effect of adding more EOFs, but it could just be due to adding more classes. So testing the classification for fixed number of EOFs and changing the number of classes would make their results and discussion more robust.

We apologize this was not clearly explained in the paper, we added an explanation to the beginning of Sect. 3.1. We tested all class numbers from 2 to 11 for each of the presented numbers of EOFs (and for many not presented). The silhouette score is a very useful metric that often gives a good recommendation for the optimal number of classes, but it does not always work perfectly, so we tested all the combinations of number of EOFs and number of classes to confirm whether its recommendation was correct. In the end we picked the number of EOFs somewhat arbitrarily to show different levels of complexity and used the number of classes that work best for each given number of EOFs based on the criteria presented in Sect. 2.3., which in case of the whole Northwestern European shelf coincides with the recommendation of the silhouette score. In case of the sub-regions it does not, but the discussion about that is in the answer to one of your minor comments later in the text.

Normally, when using high number of EOFs with a smaller number of classes or vice versa, the models either do not work at all, i.e., re-running the ensembles results in a different classification, or work, but have lower likelihood than the models we selected. In some cases the ensemble also eliminates or creates a class to get to the best number, e.g., using  $K=4, 5$  or  $6$  with  $3$  EOFs results in the same  $4$  classes because the ensemble eliminates the extra classes, which confirms that  $K=4$  is indeed the best. We have included in the appendix a table with a summary of the results of all combinations of EOFs and  $K$ s, with average likelihood over the whole region for all converging ensembles.

Literature & Discussion: I missed the "discussion" section, but I don't think it's reasonable to ask the authors to add an entire discussion section, just maybe in some locations when describing the features identified, might be a good addition to refer to some papers that could bring some insights into the processes behind these patterns. For example, regarding the features with the classification, there are some works that could highlight some of the processes behind the identified patterns (e.g., Mangini et al, 2021; Hermans et al, 2020; Frederikse et al., 2018, Chafik et al (2023), Calafat et al (2013), among others). Also, I would expect the authors to acknowledge the works of Thompson & Merrifield (2014) and of Camargo et al (2023). Both works have performed classification of ocean regions based on sea level data, and seem relevant for the present work. The ocean regions from Thompson & Merrifield have been widely used in sea level studies. The work of Camargo et al (2023) used two classifying methods to identify coherent regions of sea level variability. One of the methods of Camargo et al (2023) was SOM, which Poropat et al mention on the introduction, and hence acknowledging this work there seems fitting.

Thank you for your comment and the references, they were very useful for improving the discussion of our results. We believe that an in-depth analysis of the mechanisms contributing to sea level variability requires applying additional methods and deserves a separate paper. GMMs on their own can only find patterns, not the causes of those patterns, so here we would like to focus on finding

regions of coherent sea level variability and in our next manuscript (currently under review) we focus on the driving processes of sea level in each of the regions we found here. We realize, however, that the manuscript should nonetheless include at least some discussion of the physical background and the mechanisms driving sea level, so we included more analysis of our results, trying to explain the dominant processes in at least some of the classes/regions and connect our findings with those from other works, including the references listed by the reviewer.

## Minor comments

L47-50: Isn't this true for other classification/clustering methods also? Once clusters are identified, it can be transformed in a mask to isolate regions...

Yes, it is true. We modified the sentence to make it clear that this is a possible use of all clustering methods, not specific to GMM.

L93-94: It wasn't clear for me if it's common to use EOFs as input for GMMs, or if this was a "novel" approach that the authors found to reduce noise? Would be good to know in both cases.

It was used by all the studies we cited that were using GMMs with temperature and salinity profiles, so it is a common approach with GMMs. It is "novel" in regard to classification based on sea level; the studies we found that applied other clustering methods to sea level data usually considered whole time series. We rephrased the sentence to make this point clearer.

L101-102: Just a comment, but this is also true for SOM.

True, they are similar methods in that regard.

L124: How would the mean values give information about processes associated? I can see that the classification will tell you about the dominant EOFs, but the part about which process, it would come from your interpretation of the results, no?

True, we need to know what each EOF represents to analyze the associated processes, the classification only tells us which EOF is dominant where and helps to objectively find the region with similar values of EOFs and therefore most likely affected by similar processes. We rephrased the sentence to make it clear that knowing dominant processes requires knowledge of what individual EOFs represent.

L133: Add a reference here to 'silhouette score'. and L146: Reference for soft voting.

We added the references: Rousseeuw (1987) for the silhouette score and Cao et al. (2015) for soft voting.

Maybe add to the methods section which class number  $K$ s are tested.

We added that information to the end of Sect. 2.2., when describing the silhouette score.

Fig 3: Did you test if using a higher  $K$  value with the lower EOFs, would give a similar result? That is, using  $K=10$  to all the EOFs combination. I understand that the  $K$  number was chosen by the silhouette score, but this test could further confirm if your results are dependent on the number of EOFs or on the  $K$  number (see Major Comment 1).

Yes, we tested it. Using a high  $K$  with low EOF results in the ensemble significantly reducing the number of classes (from 10 to 6-7), but still failing to converge to the same combination of classes when using it multiple times with the same parameters. A more detailed answer is given in response to the major comment 1. We added a short discussion about it into the manuscript as well.

L202: It splits only in 4 classes, because of the K number, not because of the EOF number per se. (see previous comment and Major Comment 1).

Even when setting  $K=5$  or  $K=6$  for the individual GMMs, the ensemble eliminates one (or two) of the classes and the resulting classification looks the same as that obtained with  $K=4$ , so it is really a result of the data used for classification, including how much data is included through the selection of the number of EOFs, not just the pre-defined number of classes. We modified the text to make it clearer that it is not the GMM itself that splits the area into four classes (because GMM comes with the predefined  $K$ ), but the ensemble of GMMs, which can result in a different number of classes than the  $K$  selected for the individual GMM. You can see the classification EOF results for one run of the ensemble with 3 EOFs and  $K=5$  in Fig. R3. The model needs one more EOF to find another class.

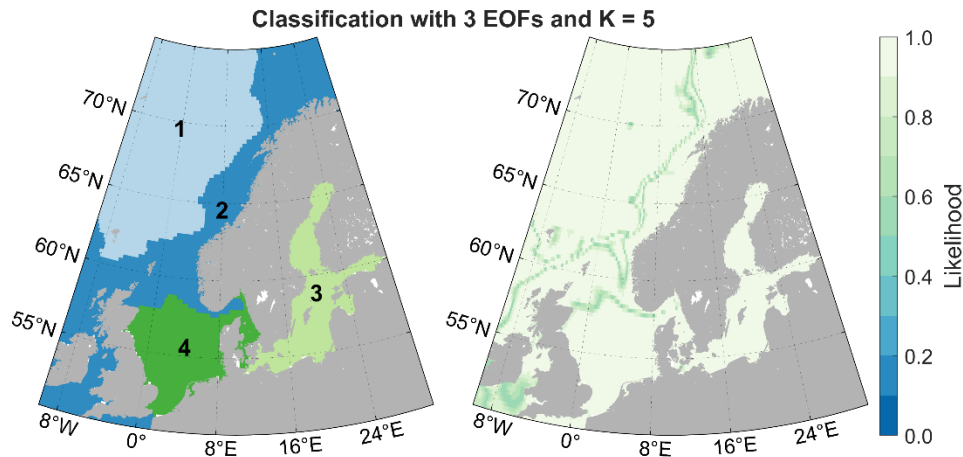

**Figure R3:** Classification (left) and accompanying likelihood (right) obtained with 3 EOFs by setting the number of classes to five for individual Gaussian Mixture Models. The ensemble of GMMs reduces the number of classes to four and the results are identical to those obtained by setting the number of classes to four (Fig. R1a).

L208-2010: Could this be an indication that you would need one more class to better represent your region? I.e., if you had  $k=5$ , then this border might be uniquely classified? (maybe not, because this border remains “difficult” in all other cases). So it might be a hint for an underlying mechanism in this region (for example, see Chafik et al (2023) and Calafat et al (2013))?

It is definitely a “difficult” border to classify, so it is very likely that this is a result of some underlying mechanism in that region. It could be related to the poleward propagation of sea-level fluctuations along the eastern boundary of the North Atlantic, driven by the local winds, as found by Chafik et al. (2023). Mangini et al. (2021; thank you for that reference too) also found a border there associated with the anomalously high sea level. North of it the high sea level is caused by both the northern and the mixed jet cluster, while south of it only by the northern cluster. According to Calafat et al. (2013), the sea level coherence along the Norwegian coast is affected by the variations in the Norwegian Current, which also affects the Atlantic inflow into the North Sea (Winther and Johannessen, 2006), so this border might be affected by that as well. We added a small discussion about this into the manuscript. Even though models with more EOFs can have a lot more classes in the whole area, they never find an additional class there, just shift the border more northward.

L225: This can also be just because you have too many classes, not necessarily too many EOFs.

This answer is affected by the data set we use for classification. With the new data set there is no such area with lower likelihood in the southern part of the North Sea, which most likely means that it was a result of some processing decisions in the old data set, not related to the number of classes or EOFs. It is not a result of a difference in time spans (the other thing we changed), we checked with the new data set and 1995-2019 time span, and the resulting classification does not have lower likelihood in that region either.

We would, however, still say that the eventual failure of the GMM ensembles to converge is a result of the noise introduced by many EOFs, as well as by the difficulty of measuring distance in high-dimensional spaces, and not the number of classes  $K$ , because the best number of classes depends on the input data, including the number of included EOFs. Models with large number of EOFs and small  $K$ s also do not work well, they have low likelihood, if they converge at all. We included a table with the summary of tested models into the revised manuscript, which makes this clearer.

L229-231: It's not only bathymetry, but the fact that different processes dominate each of those regions. From a sea level perspective: Deeper waters have a significant steric expansion, while that is not present in shallow seas. Shallow seas, in specific the North Sea, is strongly influenced by winds, and that will not happen so much in the open ocean. If you go into a physical oceanographic perspective, then other processes become important.

We apologize for writing it so vaguely, but this is what we meant. Our models definitely cannot see the bathymetry directly, they only detect the changes in sea level variability, which are often controlled by different processes depending on the water depth, and base their classes on that. In the end many of the class borders coincide with the bathymetric features, seen indirectly by the models through the changes in sea level affected by different processes that dominate in the shallow and deep waters. We clarified this in the manuscript and used some of the references you suggested.

L256: And which one was the recommended number of classes according to the silhouette score? I think it would be good to have these results in the supplementary, so that the reader can see by themselves the difference between a  $K$  number that “works better” and one that doesn't.

This answer is based on the results with the new data set. For the Baltic silhouette score recommended only 3 classes (we use 5), for the North 5 (we use 6), and for the Norwegian Sea region 7 (we use 6). The  $K$ s recommended by the silhouette score generally work in the sense that each run of the ensemble produces the same or very similar results, with just a slight shift of one of the borders, but the average likelihood of the whole region is higher for the models we selected. Please note that the Baltic and the Norwegian region include an area on the other side of the Scandinavian Peninsula because of selecting the sub-region as a longitude-latitude box. These areas are included in the models, but always sorted into their own class, which we do not assign a number or discuss. This means that the actual  $K$  provided by the silhouette score and given to the model is for these two sub-regions always one higher than what is discussed.

We would prefer to not include the silhouette score for the sub-regions into the manuscript because the selection of classes is not based on them, but we included an explanation of the  $K$  selection process. You can however see the silhouette score in Fig. R4, and the results obtained with the  $K$ s recommended by the silhouette score in Fig. R5. In case you are interested in the answer regarding the old data set: the silhouette score recommended 3 classes in the Baltic (real best was 5), only 2 classes in the North Sea (real best was 6), and 10 classes for the Norwegian Sea area (best was actually 8).

a) Baltic Sea

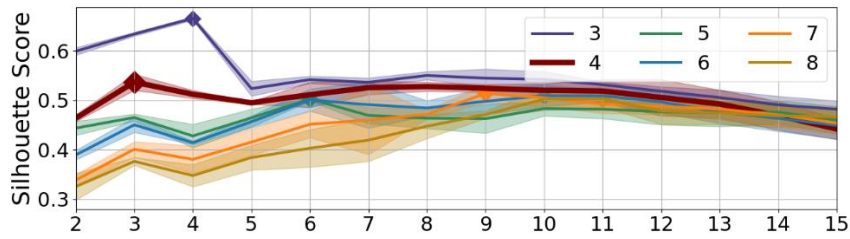

b) North Sea

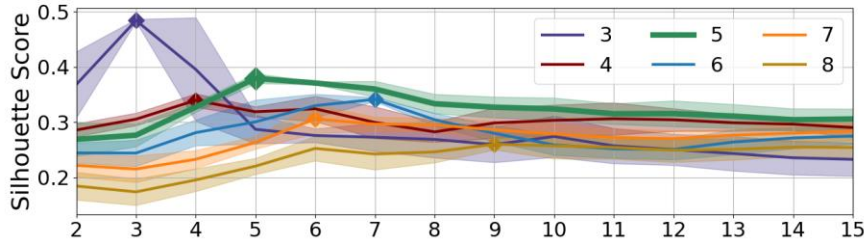

c) Norwegian Sea

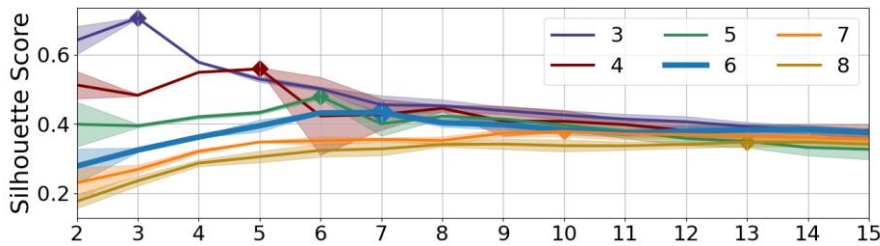

**Figure R4:** Silhouette score for the three sub-regions: Baltic Sea (a), North Sea (b), and Norwegian Sea (c). Differently colored lines represent the silhouette score computed with a different number of EOFs. The number of EOFs used in the manuscript is marked by a thicker line.

L268-270: Some papers come to mind when reading these lines: Mangini et al (2021) and Hermans et al (2020;2022)

Thank you for the references, they are very useful for explaining some of the classification results and were added to the text, albeit in a different paragraph.

Figure 5: I didn't fully understand Figure 5, especially columns b to d. It can be ignorance from my side, but I think it's worth adding a bit more explanation to it, since other readers might be confused as well. The first column is clear, as it shows in each row the first 7 EOFs. But the next three columns weren't so clear to me. At each row the classification changes, but the number of EOFs should be the same for the entire column, so what exactly is changing in each row was not clear to me. The way I interpreted it, is that at each row, you added one more EOF to your classification, so the first row had only 1 EOF for the three models ( $k=10, k=6, k=1$ ), and the second 2 EOFs, and so on... but I'm not sure if that's the correct interpretation.



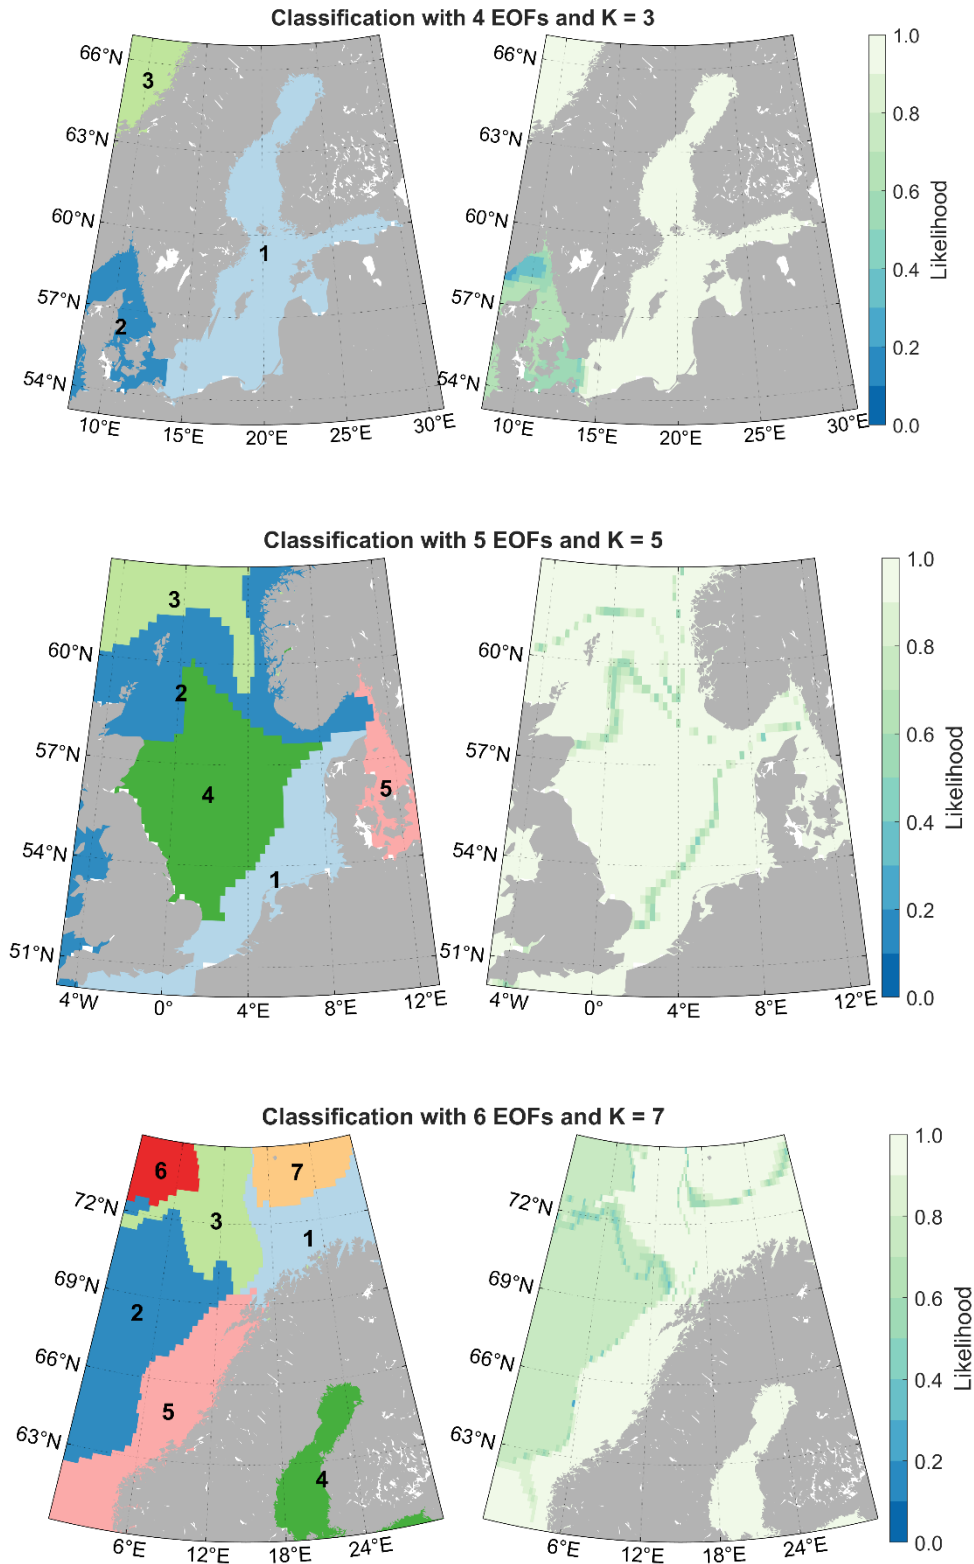

**Figure R5:** Classification using an ensemble of 200 Gaussian Mixture Models (left) and the respective likelihoods of the model sorting the grid points to that particular class (right) for the Baltic Sea performed using 4 EOFs (a); North Sea using 5 EOFs (b); and part of the Norwegian Sea using 7 EOFs (c) and the number of classes recommended by the silhouette score, which is 3, 5, and 7, respectively. Numbers indicate the assigned classes.

We apologize for not explaining Fig. 5 better. First, we would like to mention that we decided to remove the seventh EOF from the figure because it does not provide any crucial information and excluding it makes the other plots larger and more readable, so Fig. 5 in the revised manuscript only has 6 rows. The classification does not change in every row: Each of the b-d columns show one of the classification models from Fig. 3, and each row shows the class mean for each of the EOFs used for the classification. Apart from assigning classes, GMM also gives the class means and covariance matrices it fits the data to. Since it fits to multivariate Gaussian distributions, for each class it outputs a mean for each EOF used to train it, which is what we show in columns b-d by replacing the values of EOFs at each grid point with mean values from the class assigned to that grid point. Therefore, every plot in column (b) has 10 classes, in (c) 5, and in (d) 4, and the colors show the value of the EOFs. It might sometimes look like the classification changes from row to row because the color is very similar for multiple classes, but that is only because the class means for those particular EOFs and classes are very similar. Since models shown in columns (c) and (d) are based on less than 6 EOFs and they can only provide the class means for the EOFs they are based on, those columns only show the first 5 and 3 EOF maps, respectively. The model shown in column (b) is (now) based on the first 9 EOFs, so it provides class means for them, but we show the first 6 because this is the maximum we could fit onto the figure without reducing the size of individual plot too much. We hope this is clearer. We also included a similar explanation into the manuscript.

L312: Can you give an example here of a novel idea about the spatial coherence your balance highlighted? (I know you discussed the identified features previously, but quite some of them seemed like you “expected” them...so would be nice to have an example here about a novel spatial structure shown by the GGMs).

It is hard to be absolutely certain that something is completely novel because there is always a chance that we might have missed an article that already found something similar, but for example, our results are showing a different classification than the results by Mangini et al. (2021), possibly because their results are based on jet clusters, i.e., large scale wind only, while ours do not consider driving mechanisms, only sea level itself, which can be driven by other mechanisms as well. We believe our results are best used in combination with a study that uses much longer tide gauge data. For example, Dangendorf et al. (2014) found differences in sea level drivers between the western and northern North Sea and southern and eastern based on tide gauge series. Our results show that their western coast findings based on British tide gauges are most likely valid for the majority of the North Sea, while those on the east coast generally apply only in a narrow stretch near the coasts. We added these and some more examples into the manuscript, together with a discussion of the expected results that match previous studies.

L321-323: And what is the significance of this “spread”? More variability in those classes?

Yes, exactly. We added that to the text.

L351-358: This is just my opinion, so not a “requirement” as a reviewer. This entire paragraph is describing characteristics of spatial pattern classification methods in general. Most of it would also be true for SOM and K-means, for example. And it doesn’t seem to be the main take-away message of your article, but just characteristics of GGM. I would suggest ending with a stronger message about your study in specific.

Thank you for your opinion. We kept this paragraph, as it is valid for GMMs and it explains in short the benefits of the classification, but we also added a paragraph focused on the benefits of GMMs and on our results in particular to conclude the paper.

## Technical/editorial comments

L18: “so” – suggest changing it for “thus” or “therefore”, to avoid repetition (L16), and less colloquial also.

L38: I’m not sure if you can/should start a sentence with “therefore”.

L80-86: you repeat “While” three times in these lines. Suggest to modify a bit to avoid repetition.

L158: Add a comma after voting.

L246: Referring here to Figure 5a was a bit bothersome for me, and I’m not sure if it’s necessary. I went down to check it, and then got a bit lost in the text.

L334: Suggest adding “(classes)” after “mixture components”.

Section 4: This is a “summary” not a “conclusion”.

Thank you for your comments. We made the necessary modifications.

## References by reviewer

Calafat, F. M., Chambers, D. P., and Tsimplis, M. N.(2013), Inter-annual to decadal sea-level variability in the coastal zones of the Norwegian and Siberian Seas: The role of atmospheric forcing, *Geophys. Res. Oceans*, 118, 1287–1301, doi:10.1002/jgrc.20106.

Camargo, C. M. L., Riva, R. E. M., Hermans, T. H. J., Schütt, E. M., Marcos, M., Hernandez-Carrasco, I., and Slangen, A. B. A.: Regionalizing the sea-level budget with machine learning techniques, *Ocean Sci.*, 19, 17–41, <https://doi.org/10.5194/os-19-17-2023>, 2023.

Chafik, L., Nilsson, J., Rossby, T., & Kondetharayil Soman, A.(2023). The Faroe-Shetland Channel Jet: Structure, variability, and driving mechanisms. *Journal of Geophysical Research: Oceans*, 128, e2022JC019083. <https://doi.org/10.1029/2022JC019083>

Frederikse, T. and Gerkema, T.: Multi-decadal variability in seasonal mean sea level along the North Sea coast, *Ocean Sci.*, 14, 1491–1501, <https://doi.org/10.5194/os-14-1491-2018>, 2018.

Hermans, T. H. J., C. A. Katsman, C. M. L. Camargo, G. G. Garner, R. E. Kopp, and A. B. A. Slangen, 2022: The Effect of Wind Stress on Seasonal Sea-Level Change on the Northwestern European Shelf. *Climate*, 35, 1745–1759, <https://doi.org/10.1175/JCLI-D-21-0636.1>.

Hermans, T. H. J., Le Bars, D., Katsman, C. A., Camargo, C. M. L., Gerkema, T., Calafat, F. M., et al. (2020). Drivers of interannual sea level variability on the northwestern European shelf. *Journal of Geophysical Research: Oceans*, 125, e2020JC016325. <https://doi.org/10.1029/2020JC016325>

Mangini, F., Chafik, L., Madonna, E., Li, C., Bertino, L. and Nilsen, J.E.Ø., 2021. The relationship between the eddy-driven jet stream and northern European sea level variability. *Tellus A: Dynamic Meteorology and Oceanography*, 73(1), p.1886419.DOI: <https://doi.org/10.1080/16000870.2021.1886419>

Thompson, P. R. and Merrifield, M. A.: A unique asymmetry in the pattern of recent sea level change, *Geophys. Res. Lett.*, 41, 7675–7683, <https://doi.org/10.1002/2014GL061263>, 2014.

### **Additional references**

Cao, J., Kwong, S., Wang, R., Li, X., Li, K. and Kong, X. (2015): Class-specific soft voting based multiple extreme learning machines ensemble, *Neurocomputing*, 149(A), 275-284, <https://doi.org/10.1016/j.neucom.2014.02.072>

Rousseeuw, P. J. (1987): Silhouettes: A graphical aid to the interpretation and validation of cluster analysis, *Journal of Computational and Applied Mathematics*, 20, 53-65, [https://doi.org/10.1016/0377-0427\(87\)90125-7](https://doi.org/10.1016/0377-0427(87)90125-7).

Winther, N. G. and Johannessen, J. A. (2006): North Sea circulation: Atlantic inflow and its destination. *Journal of Geophysical Research*, 111(C12018), <https://doi.org/10.1029/2005JC003310>.
